# Supplementary material for: Age differences in demographic and clinical characteristics among veterans with chronic low back pain: a cross-sectional study of baseline findings from the Veteran Response to Dosage in Chiropractic Therapy (VERDICT) trial
Source: Springer Nature journal article supplement (doi:10.1186/s12998-025-00613-z), 2025-10-13
Supplement: MOESM1 [file 12998_2025_613_MOESM1_ESM.pdf]

## Supplemental Material: Demographic Characteristics by Site

|                                                                    | Connecticut  | Iowa City    | Los Angeles  | Minneapolis  |
|--------------------------------------------------------------------|--------------|--------------|--------------|--------------|
| Enrollment, n (%)                                                  | 267 (34.9)   | 250 (32.6)   | 79 (10.3)    | 170 (22.2)   |
| Age, mean (range)                                                  | 49.3 (22-87) | 50.6 (22-85) | 47.1 (22-81) | 57.1 (26-84) |
| Age <65 years, n (%)                                               | 208 (77.9)   | 197 (78.8)   | 68 (86.1)    | 105 (61.8)   |
| Age ≥65 years, n (%)                                               | 59 (22.1)    | 53 (21.2)    | 11 (13.9)    | 65 (38.2)    |
| Sex at birth, n (%)                                                |              |              |              |              |
| Male                                                               | 222 (83.2)   | 190 (76.0)   | 64 (81.0)    | 127 (74.7)   |
| Female                                                             | 45 (16.9)    | 60 (24.0)    | 15 (19.0)    | 43 (25.3)    |
| Race, n (%)                                                        |              |              |              |              |
| White                                                              | 173 (64.8)   | 197 (78.8)   | 26 (32.9)    | 136 (80.0)   |
| Black or African American                                          | 59 (22.1)    | 23 (9.2)     | 33 (41.8)    | 16 (9.4)     |
| Asian                                                              | 2 (0.8)      | 0 (0.0)      | 7 (8.9)      | 3 (1.8)      |
| American Indian or Alaskan Native                                  | 1 (0.4)      | 1 (0.4)      | 0 (0.0)      | 4 (2.4)      |
| Native Hawaiian or Pacific Islander                                | 4 (1.5)      | 1 (0.4)      | 0 (0.0)      | 3 (1.8)      |
| Multiracial                                                        | 1 (0.4)      | 6 (2.4)      | 1 (1.3)      | 0 (0.0)      |
| Unknown or Not Reported                                            | 27 (10.1)    | 22 (8.8)     | 12 (15.2)    | 8 (4.7)      |
| Ethnicity, Hispanic or Latino, n (%)                               | 43 (16.1)    | 14 (5.6)     | 13 (16.5)    | 6 (3.5)      |
| Highest Level of Education, n (%)                                  |              |              |              |              |
| Some grade school or high school                                   | 4 (1.5)      | 4 (1.6)      | 0 (0.0)      | 2 (1.2)      |
| High school graduate                                               | 53 (19.9)    | 38 (15.2)    | 9 (11.4)     | 19 (11.2)    |
| GED or equivalent                                                  | 4 (1.5)      | 8 (3.2)      | 1 (1.3)      | 4 (2.4)      |
| Some college or other program, no degree                           | 68 (25.5)    | 72 (28.8)    | 27 (34.2)    | 40 (23.5)    |
| Associate degree: occupational, technical, vocational, or academic | 48 (18.0)    | 45 (18.0)    | 12 (15.2)    | 40 (23.5)    |
| Bachelor's degree (BA, AB, BS, BBA)                                | 52 (19.5)    | 49 (19.6)    | 19 (24.1)    | 45 (26.5)    |
| Master's degree (MA, MS, MEng, MEd, MBA)                           | 34 (12.7)    | 31 (12.4)    | 8 (10.1)     | 18 (10.6)    |
| Professional degree (MD, DC, DDS, DO)                              | 3 (1.1)      | 1 (0.4)      | 0 (0.0)      | 0 (0.0)      |
| Doctoral degree (PhD, EdD)                                         | 1 (0.4)      | 2 (0.8)      | 3 (3.8)      | 1 (0.6)      |
| Employment Status, n (%)                                           |              |              |              |              |
| Working for pay                                                    | 141 (52.8)   | 125 (50.0)   | 34 (43.0)    | 72 (42.4)    |
| Retired                                                            | 65 (24.3)    | 73 (29.2)    | 18 (22.8)    | 73 (42.9)    |
| Not currently employed                                             | 21 (7.9)     | 32 (12.8)    | 24 (30.4)    | 18 (10.6)    |
| Taking care of house or family                                     | 6 (2.3)      | 1 (0.4)      | 1 (1.3)      | 1 (0.6)      |
| Other                                                              | 34 (12.7)    | 18 (7.2)     | 2 (2.5)      | 6 (3.5)      |
| Relationship Status, n (%)                                         |              |              |              |              |
| Married or living with partner                                     | 145 (54.3)   | 127 (50.8)   | 27 (34.2)    | 88 (51.8)    |
| Divorced or separated                                              | 61 (22.9)    | 58 (23.2)    | 18 (22.8)    | 43 (25.3)    |
| Widowed                                                            | 7 (2.6)      | 9 (3.6)      | 4 (5.1)      | 8 (4.7)      |
| Never been married                                                 | 54 (20.2)    | 56 (22.4)    | 30 (38.0)    | 31 (18.2)    |
| Neighborhood Status, n (%)                                         |              |              |              |              |
| Rurality                                                           | 16 (6.0)     | 66 (26.4)    | 3 (3.8)      | 23 (13.5)    |
