# Supplementary material for: Age differences in demographic and clinical characteristics among veterans with chronic low back pain: a cross-sectional study of baseline findings from the Veteran Response to Dosage in Chiropractic Therapy (VERDICT) trial
Source: Springer Nature journal article supplement (doi:10.1186/s12998-025-00613-z), 2025-10-13
Supplement: MOESM2 [file 12998_2025_613_MOESM2_ESM.pdf]

Supplemental Material: International Classification of Diseases, Edition 10 (ICD-10) Code for Low Back Pain

|         |                                                                   |
|---------|-------------------------------------------------------------------|
| Q76.415 | congenital kyphosis, thoracolumbar                                |
| Q76.426 | congenital lordosis, lumbar                                       |
| M43.9   | deforming dorsopathy, unspecified                                 |
| M43.26  | fusion of spine, lumbar region                                    |
| M43.27  | fusion of spine, lumbosacral region                               |
| M43.28  | fusion of spine, sacral and sacrococcygeal region                 |
| M43.25  | fusion of spine, thoracolumbar region                             |
| M48.26  | kissing spine, lumbar region                                      |
| M48.27  | kissing spine, lumbosacral region                                 |
| M48.25  | kissing spine, thoracolumbar region                               |
| G57.02  | lesion of sciatic nerve, left lower limb                          |
| G57.01  | lesion of sciatic nerve, right lower limb                         |
| G57.00  | lesion of sciatic nerve, unspecified lower limb                   |
| M54.05  | low back pain                                                     |
| M54.5   | low back pain                                                     |
| M54.42  | lumbago with sciatica, left side                                  |
| M54.41  | lumbago with sciatica, right side                                 |
| M79.1   | myofascial pain                                                   |
| M41.46  | neuromuscular scoliosis, lumbar                                   |
| M41.47  | neuromuscular scoliosis, lumbosacral                              |
| M41.45  | neuromuscular scoliosis, thoracolumbar                            |
| Q76.49  | other congenital malformations spine, not assoc with scoliosis    |
| M41.26  | other idiopathic scoliosis, lumbar                                |
| M41.27  | other idiopathic scoliosis, lumbosacral                           |
| M41.25  | other idiopathic scoliosis, thoracolumbar                         |
| M51.36  | other intervertebral disc degeneration, lumbar region             |
| M51.37  | other intervertebral disc degeneration, lumbosacral region        |
| M51.26  | other intervertebral disc displacement, lumbar region             |
| M51.27  | other intervertebral disc displacement, lumbosacral region        |
| M51.25  | other intervertebral disc displacement, thoracolumbar region      |
| M53.86  | other specified dorsopathies, lumbar region                       |
| M53.80  | other specified dorsopathies, site unspecified                    |
| M47.896 | other spondylosis, lumbar region                                  |
| M47.897 | other spondylosis, lumbosacral region                             |
| M43.8X6 | other unspecified dorsopathies, lumbar region                     |
| M43.8X7 | other unspecified dorsopathies, lumbosacral region                |
| M43.8X8 | other unspecified dorsopathies, sacral and sacrococcygeal region  |
| M43.8X9 | other unspecified dorsopathies, site unspecified                  |
| M43.8X5 | other unspecified dorsopathies, thoracolumbar region              |
| M54.00  | panniculitis affecting regions of neck and back, site unspecified |
| M54.16  | radiculopathy, lumbar region                                      |
| M54.17  | radiculopathy, lumbosacral region                                 |
| M53.3   | sacrococcygeal disorder nec                                       |
| M54.32  | sciatica, left side                                               |
| M54.31  | sciatica, right side                                              |
| M54.30  | sciatica, unspecified side                                        |

|         |                                                                   |
|---------|-------------------------------------------------------------------|
| M54.30  | sciatica, unspecified side                                        |
| M41.86  | scoliosis (other), lumbar region                                  |
| M41.87  | scoliosis (other), lumbosacral region                             |
| M41.85  | scoliosis (other), thoracolumbar region                           |
| M41.9   | scoliosis (other), unspecified                                    |
| M41.06  | scoliosis, lumbar                                                 |
| M41.07  | scoliosis, lumbosacral                                            |
| M41.08  | scoliosis, sacral and sacrococcygeal                              |
| M41.05  | scoliosis, thoracolumbar                                          |
| M99.03  | segmental & somatic dysfunction, lumbar region                    |
| M99.05  | segmental & somatic dysfunction, pelvic region                    |
| M99.04  | segmental & somatic dysfunction, sacrum                           |
| M48.06  | spinal stenosis, lumbar region                                    |
| M48.07  | spinal stenosis, lumbosacral region                               |
| M48.08  | spinal stenosis, sacral and sacrococcygeal region                 |
| M48.05  | spinal stenosis, thoracolumbar region                             |
| M43.16  | spondylolisthesis, lumbar region                                  |
| M43.17  | spondylolisthesis, lumbosacral region                             |
| M43.19  | spondylolisthesis, multiple sites in spine                        |
| M43.18  | spondylolisthesis, sacral and sacrococcygeal region               |
| M43.15  | spondylolisthesis, thoracolumbar region                           |
| M43.06  | spondylolysis, lumbar region                                      |
| M43.07  | spondylolysis, lumbosacral region                                 |
| M43.09  | spondylolysis, multiple sites in spine                            |
| M43.08  | spondylolysis, sacral and sacrococcygeal region                   |
| M43.05  | spondylolysis, thoracolumbar region                               |
| M47.16  | spondylosis w myelopathy, lumbar region                           |
| M47.15  | spondylosis w myelopathy, thoracolumbar region                    |
| M47.816 | spondylosis w/out myelopathy or radiculopathy, lumbar region      |
| M47.817 | spondylosis w/out myelopathy or radiculopathy, lumbosacral region |
| S33.5xx | sprain of ligaments of lumbar spine                               |
| S33.8xx | sprain of other parts of lumbar spine and pelvis                  |
| S33.6xx | sprain of sacroiliac joint                                        |
| S39.013 | strain of muscle, fascia, and tendon of pelvis                    |
| S39.012 | strain of muscle, fascia, and tendons of lower back               |
| M99.13  | subluxation complex (vertebral) of lumbar region                  |

Reference: World Health Organization. ICD-10 : International Statistical Classification of Diseases and Related Health Problems: Tenth Revision. World Health Organization; 2004.
